# Supplementary material for: Pd–CeO2/C nanocomposite derived from MIL-101(Al) for enhanced glycerol electrooxidation
Source: Royal Society of Chemistry journal article supplement (doi:10.1039/d4cc06746k), 2025-01-01
Supplement: d4cc06746k1.pdf [file d4cc06746k1.pdf]

## **Electronic Supporting Information**

Pd-CeO<sub>2</sub>/C nanocomposite derived from MIL-101(Al) for enhanced  
glycerol electrooxidation

## 1. Experimental Section

### 1.1 Chemicals

2-aminoterephthalic acid ( $\text{NH}_2\text{-BDC}$ ), aluminum chloride hexahydrate ( $\text{AlCl}_3\cdot 6\text{H}_2\text{O}$ ), cerium nitrate hexahydrate ( $\text{Ce}(\text{NO}_3)_3\cdot 6\text{H}_2\text{O}$ ), palladium(II) chloride ( $\text{PdCl}_2$ ), glycerol, potassium hydroxide ( $\text{KOH}$ ) and sodium hydroxide ( $\text{NaOH}$ ) were provided by Macklin. Commercial  $\text{Pd/C}$  (10 wt%) was provided by Bide Pharmaceutical Co., Ltd. Nafion solution (5 wt%) was purchased from DuPont Corporation (United States). Methanol and N, N-Dimethylformamide (DMF) were provided by XiLong Scientific. Sodium borohydride ( $\text{NaBH}_4$ ) was provided by Tianjin Kemio Chemical Reagent Co., Ltd. Ultra-pure water (18.2  $\text{M}\Omega$ ) has been purified by an ultra-pure water machine. All chemicals were used without any further purifications.

### 1.2 Preparation of $\text{CeO}_2/\text{MDC}$

The synthesis of  $\text{NH}_2\text{-MIL-101}(\text{Al}, \text{Ce})$  including different methodologies. The 2-aminoterephthalic acid (2.77 g, 15 mmol) was dissolved in N, N-dimethylformamide (DMF, 600 mL) in a 1000 mL of round-bottom flask and heated to  $110^\circ\text{C}$  in an oil bath. Subsequently,  $\text{AlCl}_3\cdot 6\text{H}_2\text{O}$  and  $\text{Ce}(\text{NO}_3)_3\cdot 6\text{H}_2\text{O}$  were introduced in seven equal portions, with an interval of 15 minutes between each addition. Following the final addition, the solution should be stirred at  $110^\circ\text{C}$  for three hours, after which stirring should cease and the solution should be left to stand at  $110^\circ\text{C}$  for 16 hours. Following a period of cooling to room temperature, the solid was subjected to centrifugation, washed on three occasions with methanol, and treated

with solvent exchange for a period of three days in order to remove residual DMF from the pores. Subsequently, the solid residue should be collected and subjected to vacuum drying at a temperature of 60°C for a period of 12 hours. The total quantity of metal salts introduced is 30 mmol, and the molar ratios of  $\text{AlCl}_3 \cdot 6\text{H}_2\text{O}$  and  $\text{Ce}(\text{NO}_3)_3 \cdot 6\text{H}_2\text{O}$  introduced are 2:1, 1:1, and 1:2, respectively. These products were designated as  $\text{CeO}_2/\text{MDC}_{0.5}$ ,  $\text{CeO}_2/\text{MDC}_1$ , and  $\text{CeO}_2/\text{MDC}_2$ , respectively. The product prepared without adding  $\text{Ce}(\text{NO}_3)_3 \cdot 6\text{H}_2\text{O}$  was designated as MDC.

### 1.3 Preparation of Pd-CeO<sub>2</sub>/MDC

To synthesize Pd-CeO<sub>2</sub>/MDC, 20 mg of CeO<sub>2</sub>/MDC, 1 mL of NaOH (7.5 mg mL<sup>-1</sup>), and 0.375 mL of H<sub>2</sub>PdCl<sub>4</sub> (0.1 mol L<sup>-1</sup>) were mixed in 15 mL deionized water. 4 mL of NaBH<sub>4</sub> aqueous solution (2 mg mL<sup>-1</sup>) was slowly added to the above mixture, and reacted for 30 minutes. Pd-CeO<sub>2</sub>/MDC catalysts with different CeO<sub>2</sub>/MDC ratios were synthesized similarly with the above procedures. Finally, the products were centrifuged and washed, the products were denoted as Pd-CeO<sub>2</sub>/MDC<sub>2</sub>, Pd-CeO<sub>2</sub>/MDC<sub>1</sub> and Pd-CeO<sub>2</sub>/MDC<sub>0.5</sub>, respectively. The MDC with CeO<sub>2</sub> doping was also used to support the Pd NPs similarly, the corresponding catalyst was denoted as Pd/MDC. The Pd loading in the synthesized catalyst was analyzed by the inductively coupled plasma emission spectroscopy (ICP-OES).

### 1.4 Characterizations

The crystallographic profiles of the samples were recorded in a systematic manner using a Bruker D8Advance X-ray diffractometer, which was furnished with Cu K<sub>a</sub> radiation sources operating at 40 kV and 40 mA, sourced from the United

States. The morphological features were examined in detail through scanning electron microscopy (XL30 ESEM-FEG, USA) at a standardized voltage of 10.0 kV, and subsequently analyzed by transmission electron microscopy (ARM200F, Japan). An X-ray photoelectron spectroscopy (XPS) analysis was conducted on the ESCALAB 250 Xi instrument (Thermo Fisher, China) to determine the elemental surface composition. The excitation source employed was Al K<sub>a</sub>. Throughout the course of this process, the experimental chamber was maintained at an ultra-high vacuum level of  $1.7 \times 10^{-10}$  mbar to ensure the precision. The quantitative determination of the palladium content was conducted using inductively coupled plasma optical emission spectrometry (ICP-OES), specifically the ICAP 7000 model from Thermo Scientific. Furthermore, the textural properties of the catalysts, including their specific surface area and pore size distribution, were rigorously examined through Brunner-Emmet-Teller (BET) measurements conducted on an HD88 instrument (USA) and the Barrett-Joyner-Halenda (BJH) methodology, respectively. This comprehensive suite of characterization techniques ensures an accurate and reliable assessment of the catalysts' physicochemical properties.

### 1.5 Electrochemical measurements

The catalyst ink formulations were prepared in a systematic manner, with varying amounts (20 mg for Pd-CeO<sub>2</sub>/MDC and Pd/MDC, 40 mg for commercial Pd/C with 10% Pd content) dissolved in deionized water. The catalyst was subjected to sonication for a period of 30 minutes, with the objective of achieving a uniform suspension. Subsequently, a precise volume (5  $\mu$ L) of the ink was dispensed onto the

surface of a glassy carbon electrode (GCE, 3 mm diameter), resulting in a uniform catalyst loading density of  $14.2 \mu\text{g cm}^{-2}$  upon ambient drying. In order to enhance ionic conductivity and durability, the dried catalyst layer was subjected to a further coating process, comprising the addition of 5  $\mu\text{L}$  of a 0.02% Nafion solution dispersed in ethanol, followed by a second drying step. The electrochemical evaluations were conducted in accordance with a rigorous framework utilizing a standard three-electrode configuration on the CHI760E electrochemical workstation from Shanghai Chenhua Instrument Co. The experimental setup comprised a glassy carbon electrode (GCE) acting as the working electrode, modified with distinct catalysts (Pd-CeO<sub>2</sub>/MDC, Pd/MDC, or commercial Pd/C), a potassium chloride-saturated silver/silver chloride electrode (Ag/AgCl) serving as the reference electrode, and a platinum wire as the counter electrode. Throughout the course of the experiments, a consistent electrolyte composition was employed, comprising 0.1 mol L<sup>-1</sup> glycerol and 1 mol L<sup>-1</sup> KOH, in order to facilitate the electrochemical reactions under investigation.

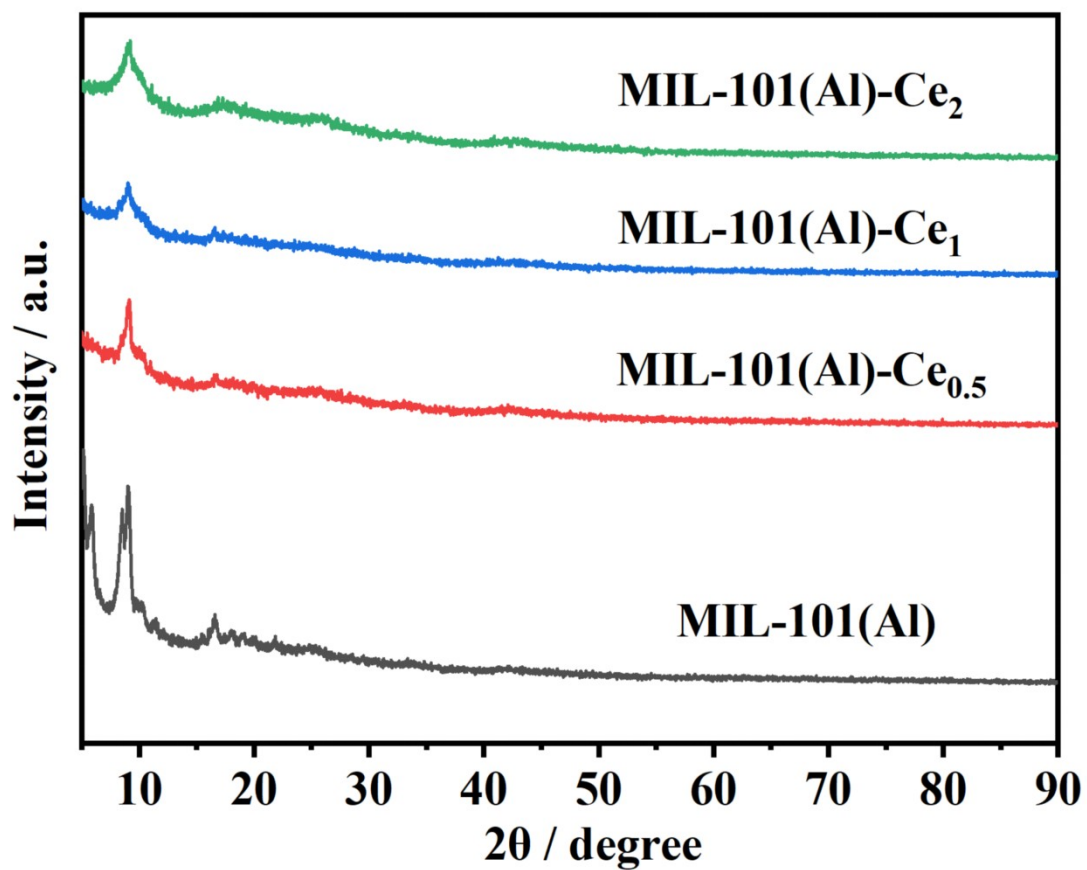

**Fig. S1 (a)** XRD patterns of MIL-101(Al) and Ce<sup>3+</sup>-doped MIL-101(Al) with different Al<sup>3+</sup>/Ce<sup>3+</sup> ratios.

**Table S1.** The ICP-OES results of different Pd-CeO<sub>2</sub>/MDC electrocatalysts.

| Sample                                  | Element | Wt/%  |
|-----------------------------------------|---------|-------|
| Pd-CeO <sub>2</sub> /MDC <sub>0.5</sub> | Pd      | 19.86 |
| Pd-CeO <sub>2</sub> /MDC <sub>1</sub>   | Pd      | 19.77 |
| Pd-CeO <sub>2</sub> /MDC <sub>2</sub>   | Pd      | 19.91 |
| Pd/MDC                                  | Pd      | 20.24 |
| Pd/C                                    | Pd      | 10.02 |

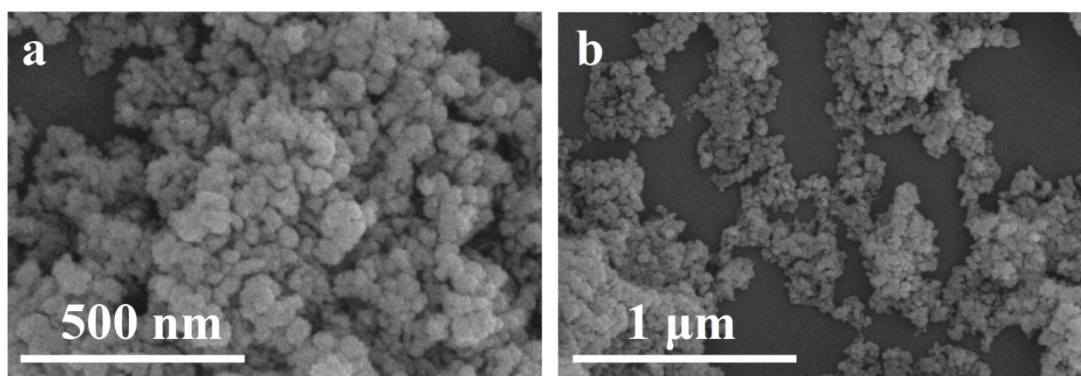

**Fig. S2** Typical SEM images of the Pd-CeO<sub>2</sub>/MDC<sub>1</sub>.



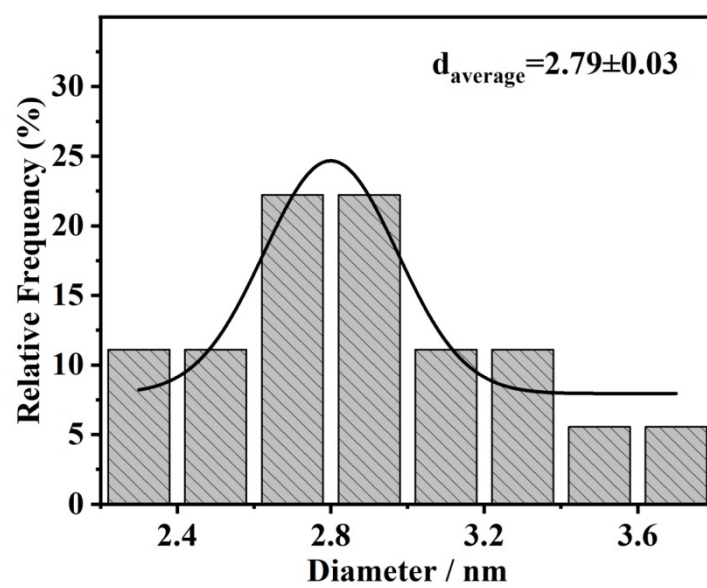

**Fig. S3** Size distribution of the Pd NPs in Pd-CeO<sub>2</sub>/MDC<sub>1</sub>.

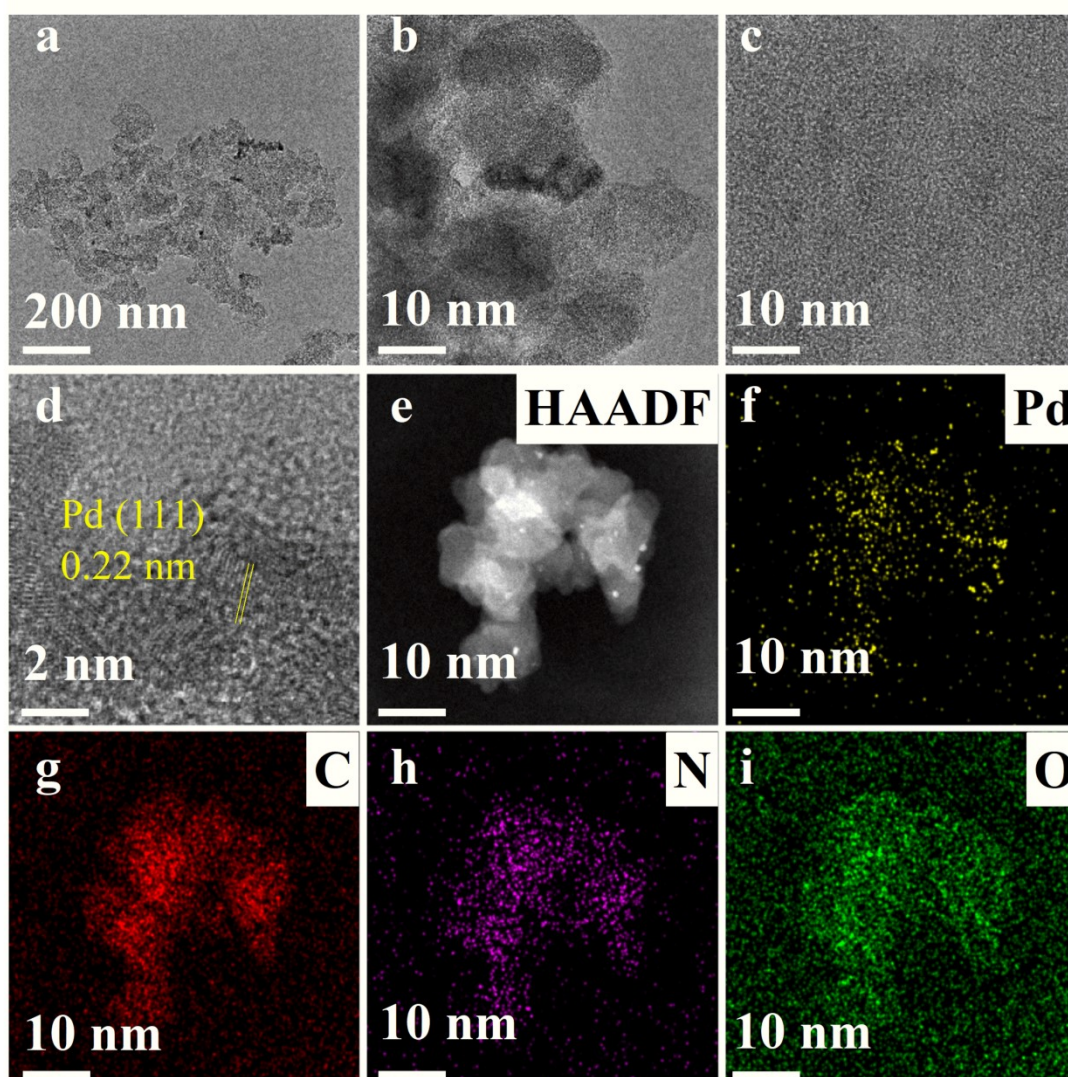

**Fig. S4** (a-d) TEM images of Pd/MDC, and elemental mapping images for Pd/MDC (f) Pd (g) C (h) N (i) O.

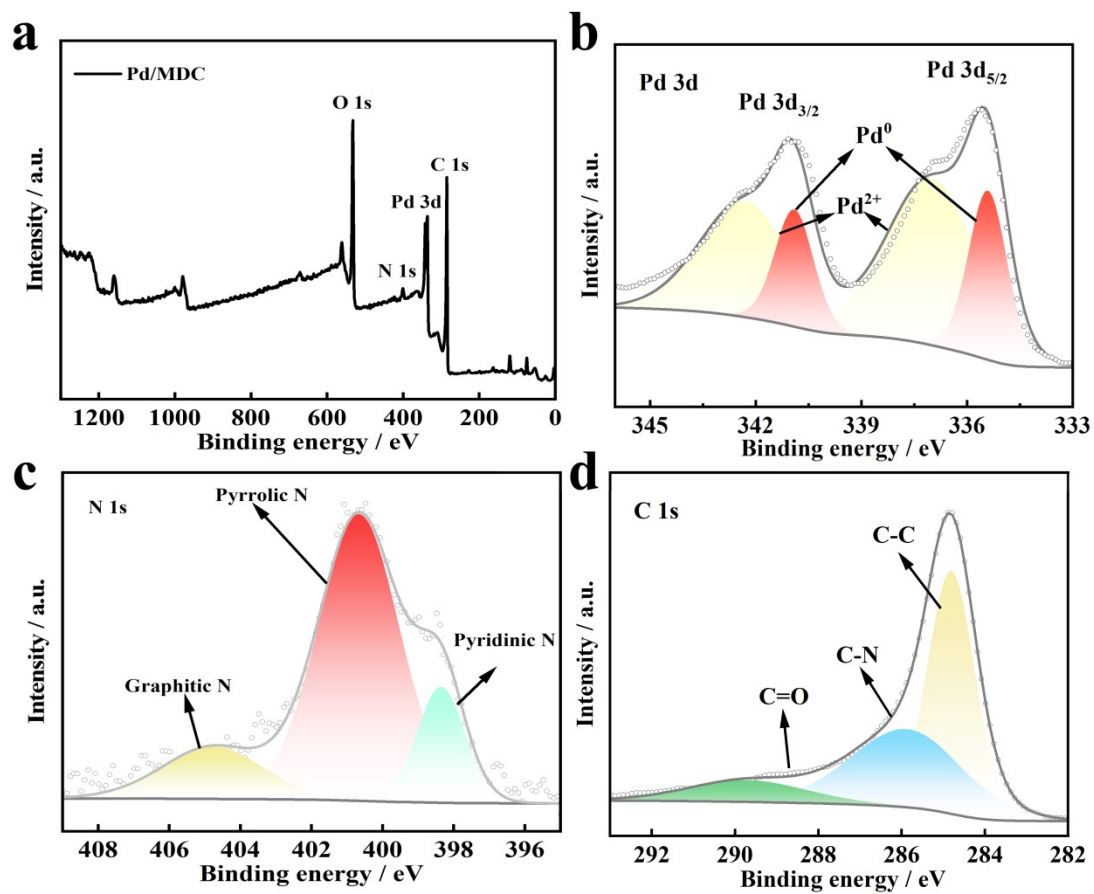

**Fig. S5** (a) XPS survey spectrum of Pd/MDC; XPS spectra of (b) Pd 3d (c) N 1s (d) C 1s of Pd/MDC.

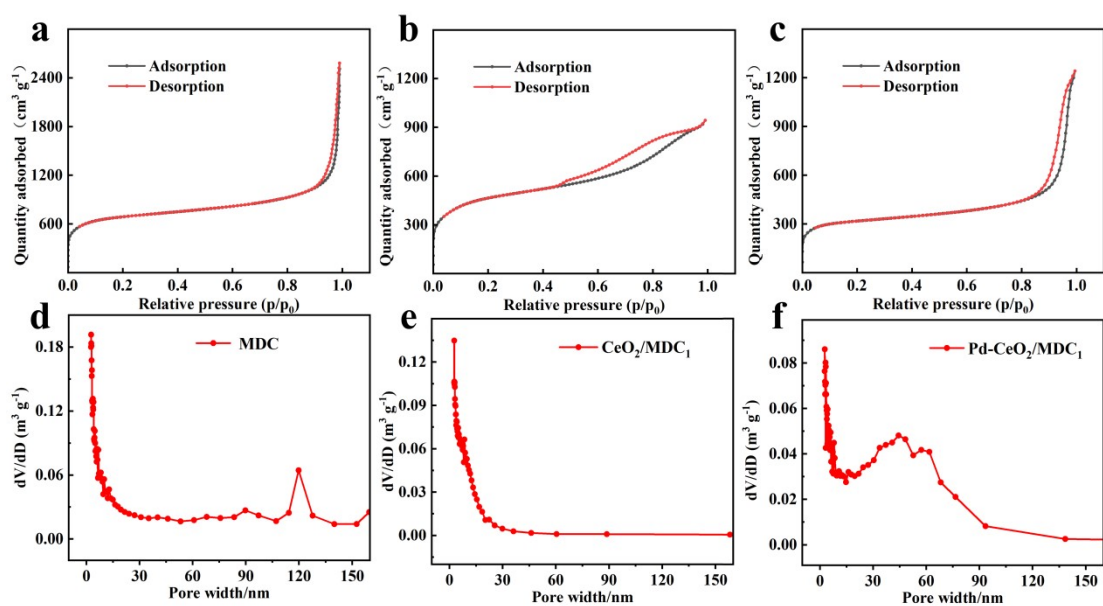

**Fig. S6** N<sub>2</sub> adsorption/desorption plots of (a) MDC, (b) CeO<sub>2</sub>/MDC<sub>1</sub>, (c) Pd-CeO<sub>2</sub>/MDC<sub>1</sub> and pore distribution of (d) MDC, (e) CeO<sub>2</sub>/MDC<sub>1</sub>, (f) Pd-CeO<sub>2</sub>/MDC<sub>1</sub>.

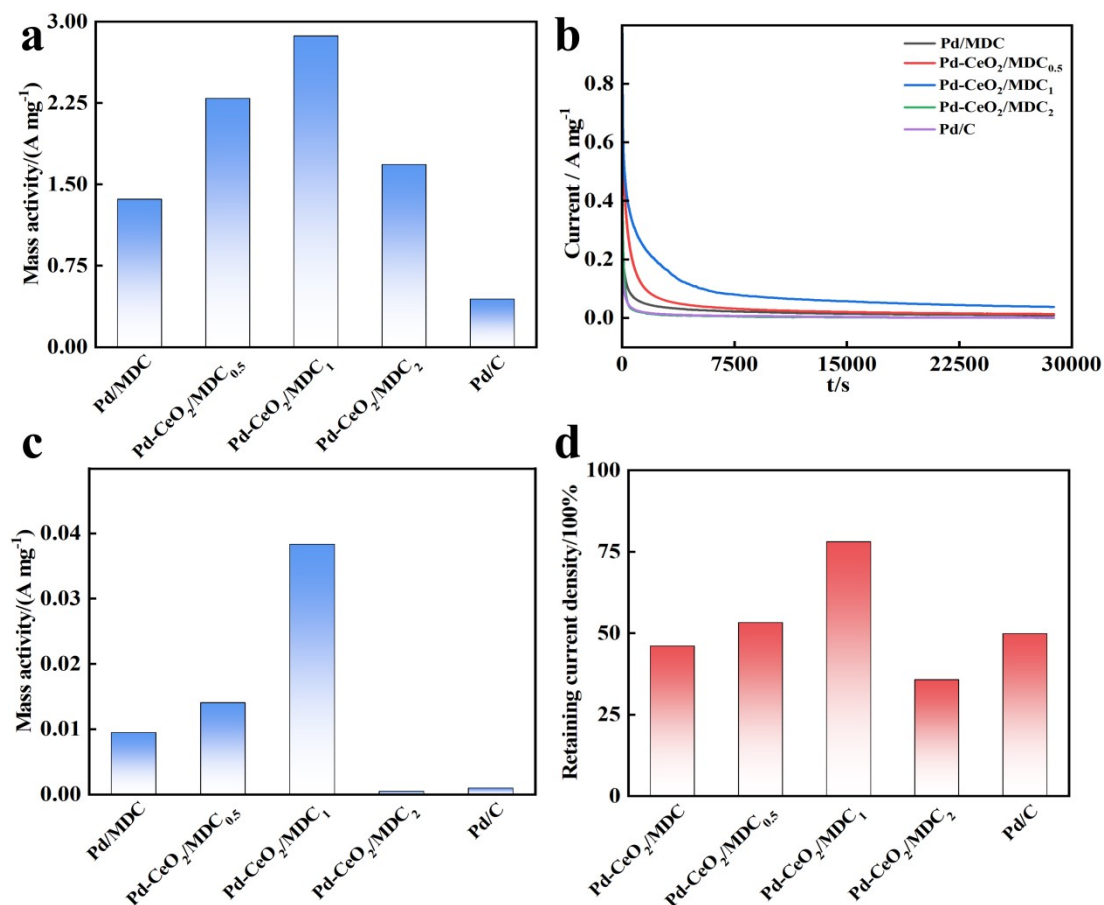

**Fig S7** (a) Mass activities of these studied electrodes, (b) CA plots, (c) the remaining mass activity after CA test, and (d) the retaining current density after 8 hours of cycling of different catalysts.

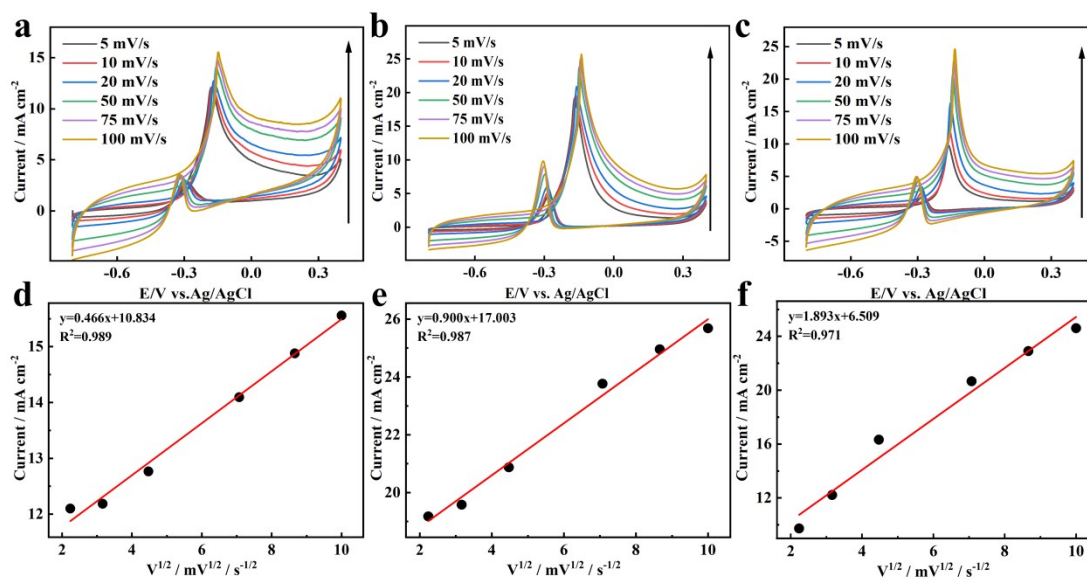

**Fig. S8** CV plots of GER by (a) Pd/MDC (b) Pd-CeO<sub>2</sub>/MDC<sub>0.5</sub>, (c) Pd-CeO<sub>2</sub>/MDC<sub>2</sub> at different scan rates and (b, c, d) the corresponding plot of  $j_p$  versus  $v^{1/2}$ .

**Table S2.** Comparison for electrocatalytic activity of Pd-CeO<sub>2</sub>/MDC<sub>1</sub> catalysts with other previously-reported catalysts for Glycerol oxidation.

| Catalysts                                           | Electrolytes             | Mass activities                       | Ref.            |
|-----------------------------------------------------|--------------------------|---------------------------------------|-----------------|
| Ag <sub>99.5</sub> Pt <sub>0.5</sub>                | 0.1 M NaOH +<br>1M GC    | 4.58 A mg <sup>-1</sup> <sub>pd</sub> | [1]             |
| Pd-Co-EGF                                           | 0.5 M KOH + 1<br>M GC    | 3.41 A mg <sup>-1</sup> <sub>pd</sub> | [2]             |
| Pd-CeO <sub>2</sub> /MDC <sub>1</sub>               | 1 M KOH + 0.1<br>M GC    | 2.87 A mg <sup>-1</sup> <sub>pd</sub> | <b>our work</b> |
| Pd/Bi <sub>2</sub> Te <sub>3</sub> -20%             | 1 M KOH + 1<br>M GC      | 2.64 A mg <sup>-1</sup> <sub>pd</sub> | [3]             |
| Pt <sub>0.85</sub> Cu <sub>0.15</sub> -CuO(3)/C     | 0.1 M NaOH +<br>0.1M GC  | 1.68 A mg <sup>-1</sup> <sub>Pt</sub> | [4]             |
| Pd-CN <sub>x</sub> /G                               | 0.5 M NaOH +<br>0.5 M GC | 1.1 A mg <sup>-1</sup> <sub>pd</sub>  | [5]             |
| Pd <sub>4</sub> Bi                                  | 1 M KOH + 0.1<br>M GC    | 0.7 A mg <sup>-1</sup> <sub>pd</sub>  | [6]             |
| Pd-NiO <sub>x</sub> -P/C                            | 1 M KOH + 1<br>M GC      | 0.36 A mg <sup>-1</sup> <sub>pd</sub> | [7]             |
| Pt <sub>0.95</sub> -Bi <sub>0.05</sub> /TiN HNWs/CC | 1 M KOH +<br>0.05 M GC   | 0.31 A mg <sup>-1</sup> <sub>Pt</sub> | [8]             |
| Pd <sub>50</sub> Ag <sub>50</sub> /C                | 0.1 M NaOH +<br>0.1 M GC | 0.26 A mg <sup>-1</sup> <sub>pd</sub> | [9]             |
| Pd <sub>50</sub> Ni <sub>50</sub> /C                | 0.1 M NaOH +<br>0.1 M GC | 0.19 A mg <sup>-1</sup> <sub>pd</sub> | [9]             |
| Pd <sub>3</sub> Sn/phen-C                           | 0.1 M KOH +<br>0.5 M GC  | 0.18 A mg <sup>-1</sup> <sub>pd</sub> | [10]            |

## References

- [1] R. N. Lima, V. D. Colle, G. Tremiliosi-Filho and C. A. Angelucci , *Electrochim. Acta*, 2024, **489** ,144181.
- [2] F. Rechothnek, M. E. G. Winkler, L. U. R. Chiavelli, O. O. S. Júnior, G. M. Pereira and R. Silva , *Electrochim. Acta*, 2024, **508** , 145235.
- [3] F. Ren, H. Pan, C. Wang and Y. Du , *ChemSusChem*, 2025, **18** ,e202401682
- [4] J. M. Sieben, A. E. Alvarez and M. D. Sanchez , *Electrochim. Acta*, 2023, **439** ,141672.
- [5] H. Wang, L. Thia, N. Li, X. Ge, Z. Liu and X. Wang , *ACS. Catal.*, 2015, **5** , 3174-3180.
- [6] A. Zalineeva, A. Serov, M. Padilla, U. Martinez, K. Artyushkova, S. Baranton, C. Coutanceau and P. B. Atanasov , *J. Am. Chem. Soc.*, 2014, **136** , 3937-3945.
- [7] Y. Kang, W. Wang, Y. Pu, J. Li, D. Chai and Z. Lei , *Chem. Eng. J.*, 2017, **308** ,419-427.
- [8] L. Liu, B. Liu, X. Xu, P. Jing and J. Zhang , *J. Power Sources*, 2022, **543** , 231836.
- [9] Y. Holade, C. Morais, S. Arrii-Clacens, K. Servat, T. W. Napporn and K. B. Kokoh , *Electrocatalysis*, 2013, **4** , 167-178.
- [10] W. Wang, Y. Kang, Y. Yang, Y. Liu, D. Chai and Lei Z , *Int. J. Hydrogen Energ*, 2016, **41** , 1272-1280.
